# Supplementary material for: Critical-depth Raman spectroscopy enables home-use non-invasive glucose monitoring
Source: PLOS journal article supplement (doi:10.1371/journal.pone.0197134), 2018-05-11
Supplement: S4 (10.1371/journal.pone.0197134.s004) [file journal.pone.0197134.s004]

Supporting Information (S2 Appendix) for

## **Critical-depth Raman spectroscopy enables home-use non-invasive glucose monitoring**

Signe M. U. Christensen<sup>1</sup>, Anders Pors<sup>1</sup>, Stefan O. Banke<sup>1</sup>, Jan E. Henriksen<sup>2</sup>, Dietrich K. Hepp<sup>3</sup>, Anders Weber<sup>1\*</sup>

<sup>1</sup> RSP Systems, Odense S, Denmark

<sup>2</sup> Department of Endocrinology, Odense University Hospital, Odense, Denmark

<sup>3</sup> Endocrinology and Diabetology, Munich, Germany

\* Corresponding author

E-mail: andersw@rspsystems.com

## Description of data fields in S1 Dataset

The unprocessed Raman spectra (and related information) that are acquired during the clinical trial and used for data analysis are collected in a .mat file in a struct named *Xfilt*.

The struct *Xfilt* contains the following information:

- Data: Unprocessed Raman spectra.
- ID: Information related to the individual Raman spectra:
  - o Col. 1: Person no. (pID)
  - o Col. 2: Analysis day
- NumDate: Time stamp as a decimal number, representing number of days from the 1<sup>st</sup> of January 2015.
- Settings: Information regarding device settings of collection depth (in  $\mu\text{m}$ ).
- Skin: Information regarding the thickness (in  $\mu\text{m}$ ) of stratum corneum on thenar.
- Yref: Reference glucose concentration (in mmol/L) from blood sample.
- Axis: Raman shifted axis ( $\text{cm}^{-1}$ ).
